# Supplementary material
Source: MDPI journal article supplement (https://www.mdpi.com/2073-445X/12/6/1179)
Supplement: s1 [file s1]

## Article

Sara Romero-Muñoz, Manuel Almestar Urteaga, Teresa Sánchez-Chaparro, Víctor Muñoz Sanz

## Supplementary Materials – links

|                                                                                                                |                                                                                                                                                                                                                                                                                                                                                                                                                                                                                                                                                                                                                             |
|----------------------------------------------------------------------------------------------------------------|-----------------------------------------------------------------------------------------------------------------------------------------------------------------------------------------------------------------------------------------------------------------------------------------------------------------------------------------------------------------------------------------------------------------------------------------------------------------------------------------------------------------------------------------------------------------------------------------------------------------------------|
| Tender documentation (official webpage)                                                                        | <a href="https://contrataciondelestado.es/wps/portal/!ut/p/b0/04_Sj9CPyKssy0xPLMnMz0vMAfljU1JTC3Iy87KtU1JLEnNyUuNzMpMzSxKTgQr0w_Wj9KMyU1zLcvQjzUMigoMyogIrUizNMyxMVQ0KcnOL08ptbfWBDEcASHXjbQ!!/">https://contrataciondelestado.es/wps/portal/!ut/p/b0/04_Sj9CPyKssy0xPLMnMz0vMAfljU1JTC3Iy87KtU1JLEnNyUuNzMpMzSxKTgQr0w_Wj9KMyU1zLcvQjzUMigoMyogIrUizNMyxMVQ0KcnOL08ptbfWBDEcASHXjbQ!!/</a>                                                                                                                                                                                                                                 |
| Tender documentacion: Competition rules document                                                               | <a href="https://estrategiaurbana.madrid.es/wp-content/uploads/2020/07/PCAP-Concurso-bosque-Metropolitano.pdf">https://estrategiaurbana.madrid.es/wp-content/uploads/2020/07/PCAP-Concurso-bosque-Metropolitano.pdf</a>                                                                                                                                                                                                                                                                                                                                                                                                     |
| Recorded co-creation sessions (the experiment) during 13 and 14 July 2020                                      | <a href="https://www.youtube.com/playlist?list=PLazAYOVsmcxAkQM1jaImNhEN2HIXp3SY9">https://www.youtube.com/playlist?list=PLazAYOVsmcxAkQM1jaImNhEN2HIXp3SY9</a>                                                                                                                                                                                                                                                                                                                                                                                                                                                             |
| Digital dashboard (Miro) developed collaboratively during co-creation sessions (the experiment)                | <a href="https://miro.com/app/board/o9J_kpIYGfY=/">https://miro.com/app/board/o9J_kpIYGfY=/</a>                                                                                                                                                                                                                                                                                                                                                                                                                                                                                                                             |
| Madrid City Council press release on the 33 proposals received for the tendering process                       | <a href="https://www.madrid.es/portales/munimadrid/es/Inicio/Actualidad/Noticias/El-Ayuntamiento-recibe-33-propuestas-para-el-concurso-de-ideas-del-Bosque-Metropolitano/?vgnnextfmt=default&amp;vgnextoid=59430cf1da045710VgnVCM2000001f4a900aRCRD&amp;vgnnextchannel=a12149fa40ec9410VgnVCM100000171f5a0aRCRD">https://www.madrid.es/portales/munimadrid/es/Inicio/Actualidad/Noticias/El-Ayuntamiento-recibe-33-propuestas-para-el-concurso-de-ideas-del-Bosque-Metropolitano/?vgnnextfmt=default&amp;vgnextoid=59430cf1da045710VgnVCM2000001f4a900aRCRD&amp;vgnnextchannel=a12149fa40ec9410VgnVCM100000171f5a0aRCRD</a> |
| City Council's Municipal Urban Regeneration Strategy 2019-2030 (framework for the Metropolitan forest project) | <a href="https://transparencia.madrid.es/portales/transparencia/es/Organizacion/Planes-y-memorias/Planes/Plan-Madrid-Recupera-Estrategia-de-Regeneracion-Urbana/?vgnextoid=251b21a54bf68610VgnVCM1000001d4a900aRCRD&amp;vgnnextchannel=d869508929a56510VgnVCM1000008a4a900aRCRD">https://transparencia.madrid.es/portales/transparencia/es/Organizacion/Planes-y-memorias/Planes/Plan-Madrid-Recupera-Estrategia-de-Regeneracion-Urbana/?vgnextoid=251b21a54bf68610VgnVCM1000001d4a900aRCRD&amp;vgnnextchannel=d869508929a56510VgnVCM1000008a4a900aRCRD</a>                                                                 |
